# Supplementary material for: Machine learning coarse grained models for water
Source: PubMed Central journal article supplement (PMC6342926; doi:10.1038/s41467-018-08222-6), 2019-01-22
Supplement: 41467_2018_8222_MOESM2_ESM.pdf [file 41467_2018_8222_MOESM2_ESM.pdf]

## **Description of Additional Supplementary Files**

File name: Supplementary Movie 1

Description: Movie of a long-time MD trajectory showing the early stages of homogeneous ice nucleation and slow growth phase followed by a more rapid growth leading to the formation of nanocrystalline ice at 210 K.

File name: Supplementary Movie 2

Description: Movie of a MD trajectory showing a zoom-in view of the later stages of grain growth mechanism and consolidation *via* grain boundary migration.

File name: Supplementary Movie 3

Description: Movie of a MD simulation showing the dynamical transformation of hexagonal layers in stacking disordered ice during the grain growth process.

File name: Supplementary Movie 4

Description: Movie of a MD simulation showing an in-plane transformation at 260 K between cubic and hexagonal layers in stacking disordered ice.
